# Phylogenetic Analysis and Molecular Dating Suggest That *Hemidactylus anamallensis* Is Not a Member of the *Hemidactylus* Radiation and Has an Ancient Late Cretaceous Origin

Rohini Bansal, K. Praveen Karanth\*

Centre for Ecological Sciences, India Institute of Science, Bangalore, India

## Abstract

**Background of the Work:** The phylogenetic position and evolution of *Hemidactylus anamallensis* (family Gekkonidae) has been much debated in recent times. In the past it has been variously assigned to genus *Hoplodactylus* (Diplodactylidae) as well as a monotypic genus '*Dravidogecko*' (Gekkonidae). Since 1995, this species has been assigned to *Hemidactylus*, but there is much disagreement between authors regarding its phylogenetic position within this genus. In a recent molecular study *H. anamallensis* was sister to *Hemidactylus* but appeared distinct from it in both mitochondrial and nuclear markers. However, this study did not include genera closely allied to *Hemidactylus*, thus a robust evaluation of this hypothesis was not undertaken.

**Methods:** The objective of this study was to investigate the phylogenetic position of *H. anamallensis* within the gekkonid radiation. To this end, several nuclear and mitochondrial markers were sequenced from *H. anamallensis*, selected members of the *Hemidactylus* radiation and genera closely allied to *Hemidactylus*. These sequences in conjunction with published sequences were subjected to multiple phylogenetic analyses. Furthermore the nuclear dataset was also subjected to molecular dating analysis to ascertain the divergence between *H. anamallensis* and related genera.

**Results and Conclusion:** Results showed that *H. anamallensis* lineage was indeed sister to *Hemidactylus* group but was separated from the rest of the *Hemidactylus* by a long branch. The divergence estimates supported a scenario wherein *H. anamallensis* dispersed across a marine barrier to the drifting peninsular Indian plate in the late Cretaceous whereas *Hemidactylus* arrived on the peninsular India after the Indian plate collided with the Eurasian plate. Based on these molecular evidence and biogeographical scenario we suggest that the genus *Dravidogecko* should be resurrected.

**Citation:** Bansal R, Karanth KP (2013) Phylogenetic Analysis and Molecular Dating Suggest That *Hemidactylus anamallensis* Is Not a Member of the *Hemidactylus* Radiation and Has an Ancient Late Cretaceous Origin. PLoS ONE 8(5): e60615. doi:10.1371/journal.pone.0060615

**Editor:** Keith A. Crandall, George Washington University, United States of America

**Received:** May 26, 2011; **Accepted:** March 1, 2013; **Published:** May 16, 2013

**Copyright:** © 2013 Bansal, Karanth. This is an open-access article distributed under the terms of the Creative Commons Attribution License, which permits unrestricted use, distribution, and reproduction in any medium, provided the original author and source are credited.

**Funding:** This research was supported by a grant from the Ministry of Environment and Forest and Department of Science and Technology, Government of India (SR/SO/AS-57/2009). The funders had no role in study design, data collection and analysis, decision to publish, or preparation of the manuscript.

**Competing Interests:** The authors have declared that no competing interests exist.

\* E-mail: karanth@ces.iisc.ernet.in

## Introduction

*Hemidactylus anamallensis*, a gekkonid endemic to the Western Ghats of South India has undergone many taxonomic revisions, yet its phylogenetic position and taxonomic status remains unresolved. This species was originally described as a member of *Hoplodactylus* [1,2], a genus in the family Diplodactylidae that is confined to New Zealand. Smith [3] assigned it to a new monotypic genus '*Dravidogecko*' on the basis of the differences in subdigital pads and the arrangement of preanal pores, in the family Gekkonidae. Underwood [4] and Kluge [5] also demonstrated that *Dravidogecko* was a gekkonid gecko and not a member of the family Diplodactylidae. Russell [6,7] on the basis of digital structure hypothesised that *Dravidogecko* was closely related to *Hemidactylus* group within family Gekkonidae. Later, Bauer and Russell [8] synonymised *Dravidogecko* as *Hemidactylus*, renaming it as *Hemidactylus anamallensis*, because there were no morphological features that were unique to *Dravidogecko* when compared with

*Hemidactylus*. They also suggested that *H. anamallensis* could be a primitive *Hemidactylus*.

*Hemidactylus* is a species rich genus with 122 recognised species [9] distributed worldwide and has been identified predominantly on the basis of its phalangeal taxonomy [3,6,10,11]. Russell [6] suggested that the genera *Briba*, *Cosymbotus*, *Dravidogecko* and *Teratolepis* also belong to *Hemidactylus*. Carranza and Arnold [12] undertook one of the most comprehensive phylogenetic studies of *Hemidactylus* based on mitochondrial 12S rRNA and cytochrome *b* sequenced from 30 species sampled from around the world. Their phylogeny retrieved five well supported clades. Three subsequent studies that included additional species (around 14) also retrieved the aforementioned clades [13–15]. In Carranza and Arnold [12] phylogeny *Cosymbotus* (distributed in Southeast Asia) and *Briba* (monotypic genus from Brazil) were deeply nested within the *Hemidactylus* group, hence they synonymised these genera with *Hemidactylus*. Bauer et al. [13], using molecular data from five

genes, showed that *Teratolepis* was deeply embedded within the tropical Asian clade of *Hemidactylus* along with the ground dwelling geckos endemic to Indian subcontinent. Therefore, they synonymised it with *Hemidactylus*, renaming it as *Hemidactylus imbricatus*. These studies did not include *H. anamallensis*. Thus, its affinity to *Hemidactylus* based on morphological data needs to be evaluated using molecular data.

Within the *Hemidactylus* radiation, *H. anamallensis* has been assigned to the *H. bowringii* complex in the tropical Asian clade by Zug et al. [16]. Whereas Bauer et al. [13] suspected that *H. anamallensis* is part of a highly derived lineage, consisting of *H. albofaciatus-imbricatus-reticulatus* within the *H. brookii* complex in the tropical Asian clade. Thus, both the above scenarios would predict *H. anamallensis* to be deeply nested within the *Hemidactylus* radiation, but differ with respect to its exact phylogenetic position. These scenarios are in sharp contrast to Bauer and Russell's [8] hypothesis, wherein they considered *H. anamallensis* to be a primitive *Hemidactylus*, thereby suggesting that phylogenetically it could be sister to all the *Hemidactylus* species. These putative phylogenetic positions of *H. anamallensis* generate very different biogeographical scenarios for the origin and spread of both *H. anamallensis* and other *Hemidactylus* species of the Indian subcontinent. Interestingly, in a recent molecular work by Bansal and Karanth [15], *H. anamallensis* was indeed sister to all the *Hemidactylus* thus supporting Bauer and Russell [8] hypothesis. Nevertheless their results also suggested that "*H. anamallensis*" was genetically distinct from other *Hemidactylus*. However, in their study genera closely allied to *Hemidactylus* were not included, thus a robust evaluation of the phylogenetic position of *H. anamallensis* with respect to the genus *Hemidactylus* could not be undertaken. Therefore, the authors called for a re-examination of its allocation to the genus *Hemidactylus* with additional molecular data from related genera.

The objective of this study was to investigate the phylogenetic position of *H. anamallensis* within the gekkonid radiation. To this end, several nuclear and mitochondrial markers were sequenced from multiple *H. anamallensis* samples and these sequences were combined with published sequences of gekkonids. These alignments were then subjected to multiple phylogenetic analyses. Results from these analyses in conjunction with molecular dating were used to understand the origin and biogeography of *H. anamallensis*.

## Results

### Phylogenetic position of *H. anamallensis* within Gekkonidae (*C-mos* and *12S rRNA* dataset)

All tree building methods retrieved a strongly supported clade consisting of the genera *Agamura*, *Crossobamon*, *Cyrtodactylus*, *Cyrtopodian*, *Geckoella*, *Hemidactylus*, *Stenodactylus* and *Tropicolotes*. Members of this clade, henceforth referred to as deletion clade, also shared a 21 bp deletion in the *C-mos* gene (Bayesian tree shown in figure 1a and b). The relationships between members of the deletion clade were also identical across tree-building methods. Within the deletion clade, *Hemidactylus* (excluding *H. anamallensis*) formed a clade with high support. Additionally it was observed that the members of this *Hemidactylus* clade shared a unique 9 bp insertion in the *C-mos* gene (figure 1b). However, this insertion was not seen in *H. anamallensis*. In all the trees *H. anamallensis* emerged as sister to the rest of the *Hemidactylus* radiation. For a list of sequences used and their accession numbers see table 1.

### Clarifying the position of *H. anamallensis* within the clade consisting of *Hemidactylus* and other closely related genera (*RAG-1* and *PDC* dataset)

In all the methods of phylogenetic inference, *H. anamallensis* emerged as sister to *Hemidactylus* and was separated from *Hemidactylus* by a long branch (Bayesian tree shown in figure 2). Genera *Cyrtodactylus* and *Geckoella* were sister to *Hemidactylus-H. anamallensis* clade. The overall topology of the Bayesian, ML and MP trees were similar with respect to the relationships among *Cyrtodactylus*, *Geckoella*, *Hemidactylus* and *H. anamallensis*. For a list of sequences used and their accession numbers see table 1.

### Divergence dates estimates

Bayesian estimation of divergence dates suggests that the ancestral lineage leading to *H. anamallensis* and the remaining *Hemidactylus* (node C) diverged from each other around 68.9 million years ago (mya) (95% HPD 45.15–92.65 mya) (figure 2, table 2). Additionally the lineage leading to the remaining *Hemidactylus* underwent radiation much later around 49.62 mya (Node D, 95% HPD 32.12–67.12 mya) (figure 2, table 2). The divergence dates estimated at the other nodes in this analysis were concordant with the divergence dates from previous studies [17–19].

## Discussion

The molecular data presented in the current study provided interesting insights into the phylogenetic position of *H. anamallensis* within Gekkonidae. The *C-mos* and *12S rRNA* dataset suggested that *H. anamallensis* was part of a large clade consisting of genera such as *Agamura*, *Cyrtodactylus*, *Cyrtopodian*, *Geckoella*, *Hemidactylus*, *Stenodactylus*, and *Tropicolotes* (figure 1). This clade received high posterior probability and bootstrap support and, more importantly the members of this clade shared a 21 bp deletion that was not seen in any other gekkonid. Within the deletion clade *H. anamallensis* was sister to *Hemidactylus*. *H. anamallensis* and *Hemidactylus* were also retrieved as sister to each other by *RAG-1* and *PDC* dataset. Thus the nuclear markers support Bauer and Russell's [8] hypothesis that *H. anamallensis* might be a primitive *Hemidactylus*.

Interestingly in the *C-mos* gene, a 9 bp insertion was observed among *Hemidactylus* (figure 1b). This insertion was unique to the *Hemidactylus* lineage and was not shared with any other Gekkonid including *H. anamallensis*. Furthermore in the *RAG-1 + PDC* tree *H. anamallensis* was separated from the rest of the *Hemidactylus* by a long branch. Thus among nuclear markers *H. anamallensis* appeared distinct from the remaining *Hemidactylus*.

Our divergence date estimates based on both fossils as well as biogeographical events suggested that the divergence between the lineage leading to *H. anamallensis* and the rest of the *Hemidactylus* lineage occurred around 68.9 mya (95% HPD 48.15–89.65) (figure 2, table 2) in the late Cretaceous. However, the remaining members of the *Hemidactylus* lineage radiated much later around 49.62 mya (95% HPD 36.12–63.12) (figure 2, table 2) in the Eocene. During the late Cretaceous period peninsular Indian landmass was isolated from all other landmasses having separated from Madagascar around 80 mya. Nevertheless fossil evidence suggested that peninsular India, during its northward journey, remained close to Africa and Eurasia until it collided with the Asian plate around 55 mya [20,21]. Thus faunal links between peninsular Indian and these landmasses were maintained by vagile animals, which were able to surmount minor marine barriers [20]. Interestingly members of the deletion clade (figure 1a), which consisted of genera closely related to *H. anamallensis*, are distributed



**Table 1.** List of sequences used in the current study.

| Sample name                         | GenBank Accession numbers |                                                                      |          |          |           |           |
|-------------------------------------|---------------------------|----------------------------------------------------------------------|----------|----------|-----------|-----------|
|                                     | Voucher Number            | Locality                                                             | C-mos    | 12S rRNA | RAG-1     | PDC       |
| <i>Aristelliger lar</i>             | JB 01                     | Dominican Republic                                                   | -        | -        | EF534805  | EF534847  |
| <i>Bavayia cyclura</i>              | AMB 7683                  | New Caledonia                                                        | -        | -        | HQ 426264 | HQ 426176 |
| <i>Blaesodactylus antongilensis</i> | ZCMV 2187                 | Nosy Mangabe, Madagascar                                             | -        | -        | EU054229  | EU054205  |
| <i>Blaesodactylus sakalava</i>      | WRBM 18                   | Will's Track, Toliara District, Madagascar                           | -        | -        | EU054227  | EU054203  |
| <i>Carphodactylus laevis</i>        | AMS 143258                | Queensland, Australia                                                | -        | -        | EF534781  | EF534821  |
| <i>Cnemaspis limi</i>               | LLG 6267                  | Pulau Tioman, Malaysia                                               | -        | -        | EF534809  | EF534851  |
| <i>Coleonyx variegatus</i>          | CAS 205334                | California, USA                                                      | -        | -        | EF 534777 | EF 534817 |
| <i>Cyrtodactylus ayeyawadyensis</i> | CAS 216446                | vic. Kanthaya Beach, Rakhine State, Myanmar                          | -        | -        | EU268287  | EU268317  |
| <i>Cyrtodactylus consobrinus</i>    | LLG 4062                  | Niah Cave, Sarawak, Malaysia                                         | -        | -        | EU268288  | EU268318  |
| <i>Cyrtodactylus fasciotlatus</i>   | CES 091196                | Kempton road, Mussoorie, Uttarakhand, India                          | KC735108 | KC735096 | HM622351  | HM622366  |
| <i>Cyrtodactylus gubernatoris</i>   | CES 1197                  | Singhtum, Sikkim                                                     | -        | -        | KC735086  | KC735091  |
| <i>Cyrtodactylus khasiensis</i>     | CES 1101                  | Northeast India                                                      | KC735109 | KC735097 | -         | -         |
| <i>Cyrtodactylus loriae</i>         | FK 7709                   | N slope of Mt. Simpson, Bunisi, Milne Bay Province, Papua New Guinea | -        | -        | EU268289  | EU268319  |
| <i>Cyrtopodian scrubum</i>          | CES1104                   | Sam, Rajasthan                                                       | KC735110 | KC735098 | -         | -         |
| <i>Cyrtopodian kacchensis</i>       | CES1146                   | Kutch, Gujarat                                                       | KC735111 | KC735099 | -         | -         |
| <i>Cyrtopodian species</i>          | CES1107                   | Kuno, Madhya Pradesh                                                 | KC735112 | KC735100 | -         | -         |
| <i>Delma Tincta</i>                 | AMS 151607                | Sturt Natl. Pk., NSW, Australia                                      | -        | -        | HQ 426277 | HQ 426188 |
| <i>Diplodactylus conspicillatus</i> | AMS 158426                | Sturt Natl. Park, NSW, Australia                                     | -        | -        | HQ 426278 | HQ 426189 |
| <i>Elgaria kingii</i>               | TG 00065                  | Navajo County, Arizona, USA                                          | -        | -        | AY662603  | HQ426252  |
| <i>Eublepharis macularius</i>       | JS 2                      | Pakistan                                                             | -        | -        | EF 534776 | EF 534816 |
| <i>Euleptes europea</i>             | -                         | Liguria, Italy                                                       | -        | -        | EF534806  | EF534848  |
| <i>Geckoella collagensis</i>        | CES 1136                  | Mumbai, Maharashtra                                                  | -        | -        | KC735087  | KC735092  |
| <i>Gekko gekko</i>                  | No ID                     | unknown                                                              | -        | -        | EF534813  | EF534854  |
| <i>Goniurosaurus araneus</i>        | JFBM 15830                | Vietnam                                                              | -        | -        | HQ 426286 | HQ 426197 |
| <i>Gymnodactylus amarali</i>        | CHUNB 38646               | Cocalzinho, Goiás, Brazil                                            | -        | -        | HQ 426288 | HQ 426199 |
| <i>Heloderma suspectum</i>          | TG 00068                  | Arizona, USA                                                         | -        | -        | AY662606  | HQ426254  |
| <i>Hemidactylus anamallensis 1</i>  | CES 08029                 | Vadiyoor, Eravikulam, Tamil Nadu, India                              | KC735113 | HM595680 | HM622353  | HM622368  |
| <i>Hemidactylus anamallensis 2</i>  | CES 08030                 | Vadiyoor, Eravikulam, Tamil Nadu, India                              | KC735114 | KC735101 | KC735088  | KC735093  |
| <i>Hemidactylus anamallensis 3</i>  | CES 10002                 | Wayanad, Tamil Nadu, India                                           | KC735115 | KC735102 | KC735089  | KC735094  |
| <i>Hemidactylus anamallensis 4</i>  | CES 10003                 | Wayanad, Tamil Nadu, India                                           | KC735116 | KC735103 | -         | -         |
| <i>Hemidactylus anamallensis 5</i>  | CES 10004                 | Wayanad, Tamil Nadu, India                                           | KC735117 | KC735104 | KC735090  | KC735095  |
| <i>Hemidactylus angulatus</i>       | MVZ 245438                | Nigeria, Togo Hills, Nkwanta                                         | HQ426540 | -        | EU268306  | EU268336  |
| <i>Hemidactylus angulatus 1</i>     | E1708.15                  | Kajiado District, Rift valley, Kenya                                 | -        | DQ120412 | -         | -         |
| <i>Hemidactylus bowringii</i>       | CES 08008                 | Sikkim, India                                                        | -        | -        | HM622354  | HM622369  |
| <i>Hemidactylus brookii 2</i>       | CES 06080                 | Palakkad, Kerala, India                                              | KC735118 | HM595685 | HM622355  | HM622370  |
| <i>Hemidactylus fasciatus 2</i>     | -                         | Rabi, Gabon                                                          | -        | -        | EU268309  | EU268339  |
| <i>Hemidactylus frenatus 2</i>      | CES 07035                 | Athirapalli, Valparai, Tamil Nadu, India                             | KC735119 | KC735105 | HM622371  | HM622356  |

Table 1. Cont.

| Sample name                       | GenBank Accession numbers |                                                          |          |          |           |           |
|-----------------------------------|---------------------------|----------------------------------------------------------|----------|----------|-----------|-----------|
|                                   | Voucher Number            | Locality                                                 | C-mos    | 12S rRNA | RAG-1     | PDC       |
| <i>Hemidactylus giganteus</i>     | CES 07013                 | Nandi Hills, near Bangalore, Karnataka, India            | KC735120 | KC735106 | -         | -         |
| <i>Hemidactylus giganteus</i>     | CES 08013                 | Hampi, Karnataka, India                                  | -        | -        | HM622357  | HM622372  |
| <i>Hemidactylus graniticolous</i> | CES 08028                 | Nilgiri Hills, Tamil Nadu, India                         | -        | -        | HM622361  | HM622375  |
| <i>Hemidactylus greefii</i>       | CAS 219044                | Praia da Mutamba, São Tome Island, São Tome and Principe | HQ426542 | -        | EU268308  | EU268338  |
| <i>Hemidactylus greefii</i>       | E7014.4                   | Principe, Sao Tome and Principe                          | -        | DQ120414 | -         | -         |
| <i>Hemidactylus haitianus</i>     | AMB 4189                  | Dominican Republic (1), Santo Domingo                    | HQ426543 | -        | -         | -         |
| <i>Hemidactylus haitianus 1</i>   | Hhaiti5                   | Matanzas, Matanzas province, Cuba                        | -        | DQ120388 | -         | -         |
| <i>Hemidactylus haitianus 2</i>   | CAS 198442                | near Santo Domingo, Nacional Dist., Dominican Republic   | -        | -        | EU268311  | EU268341  |
| <i>Hemidactylus mabouia</i>       | E609.20                   | Lake Nabugabo, Masaka District, Uganda                   | -        | DQ120377 | -         | -         |
| <i>Hemidactylus mabouia</i>       | MCZ R-184446              | Limpopo Province, South Africa                           | -        | -        | EU268300  | EU268330  |
| <i>Hemidactylus mabouia</i>       | JME 1864                  | Wundanyi, Kenya                                          | HQ426546 | -        | -         | -         |
| <i>Hemidactylus maculatus</i>     | BNHS 1516                 | Zirad, Raigadh dist., Maharashtra, India                 | -        | -        | HM559707  | HM559674  |
| <i>Hemidactylus palaichthus</i>   | LSUMZ H-12421             | Roraima State, Brazil                                    | -        | -        | EU268307  | EU268337  |
| <i>Hemidactylus persicus 2</i>    | CES 08027                 | Nabh Dongar, Jaisalmer, Rajasthan, India                 | KC735121 | KC735107 | HM622362  | HM622376  |
| <i>Hemidactylus platyurus 2</i>   | CES 08025                 | Kalimpong, West Bengal, India                            | -        | -        | HM622363  | HM622377  |
| <i>Hemidactylus robustus</i>      | MVZ 248437                | 40 km South of Mipur Sakro, Thatta District, Pakistan    | -        | -        | EU268315  | EU268345  |
| <i>Hemidactylus turcicus</i>      | LSUMZ H-1981              | Baton Rouge, Louisiana, USA                              | -        | -        | EU268299  | EU268329  |
| <i>Homonota fasciata</i>          | TG 00085                  | Paraguay                                                 | -        | -        | EU 293629 | EU 293697 |
| <i>Lepidodactylus lugubris</i>    | AMB 4111                  | Kirimati, Kiribati                                       | -        | -        | EF534812  | EF534853  |
| <i>Lialis burtonis</i>            | TG 00078                  | Provinsi Papua, Indonesia                                | -        | -        | EF 534782 | EF 534822 |
| <i>Narudasia festiva</i>          | AMB 3243                  | Narudas, Namibia                                         | -        | -        | EF534808  | EF534850  |
| <i>Nephrurus milii</i>            | AMB 499                   | Western Australia, Australia                             | -        | -        | EF534780  | EF534820  |
| <i>Oedura marmorata</i>           | AMS 143861                | Queensland, Australia                                    | -        | -        | EF 534779 | EF 534819 |
| <i>Paradelma orientalis</i>       | QM-J56089                 | 20 km N Capella, Queensland, Australia                   | -        | -        | HQ 426304 | HQ 426215 |
| <i>Phelsuma madagascariensis</i>  | FG/MV 2002.797            | Manongarivo, Madagascar                                  | -        | -        | EF534811  | AB081507  |
| <i>Phyllodactylus xantii</i>      | ROM 38490                 | Baja California Sur, Mexico                              | -        | -        | EF 534807 | EF 534849 |
| <i>Phyllodactylus xantii</i>      | ROM 38490                 | Baja California Sur, Mexico                              | -        | -        | EF534807  | EF534849  |
| <i>Pristurus carteri</i>          | TG 00083                  | Yemen                                                    | -        | -        | EF534803  | EF534845  |
| <i>Pygopus nigriceps</i>          | AMB 53                    | Northern Territory, Australia                            | -        | -        | EF 534783 | EF 534823 |
| <i>Rhoptropus Boultoni</i>        | CAS 214713                | Twyfelfontein, Namibia                                   | -        | -        | EF534810  | EF534852  |
| <i>Sphaerodactylus elegans</i>    | YPM 14795                 | Florida, USA                                             | -        | -        | EF534787  | EF534828  |
| <i>Tarentola Americana</i>        | MVZ 241223                | 13 km E of Pilon, Granma Province, Cuba                  | -        | -        | HQ 426332 | HQ 426243 |
| <i>Teratoscincus roborowskii</i>  | TG 00070                  | China                                                    | -        | -        | EF534799  | EF534841  |
| <i>Thecadactylus solimoensis</i>  | KU 214929                 | Cuzco Amazonico, Madre de Dios, Peru                     | -        | -        | EU 293644 | EU 293711 |

Sequences generated by the authors have accession numbers starting with KC. For a complete list of *C-mos* and *12S rRNA* sequences see Feng et al. [25].  
doi:10.1371/journal.pone.0060615.t001



phylogenetic position of *H. anamallensis* within Gekkonidae, the sequences generated by us were added to a combined dataset of the nuclear *C-mos* and mitochondrial *12S rRNA* genes generated by Feng et al. [25]. To clarify the position *H. anamallensis* within the clade consisting of *Hemidactylus* and other closely related genera: *RAG-1* and *PDC* datasets generated by Bauer et al. [13], Gamble et al. [17] and Bansal and Karanth [15] were used. In both the above datasets representatives from all the five clades of the *Hemidactylus* radiation were included. These sequences were aligned using ClustalW 1.6 [26] in the software MEGA v. 4.1 [27], using default parameters. These two datasets were then subjected to maximum parsimony (MP), maximum likelihood (ML) and Bayesian analyses. The two datasets could not be combined because there was a lack of overlap in sequence data between them. The *C-mos+12S rRNA* dataset generated by Feng et al. [25] had sequences largely for family Gekkonidae, thus this dataset was useful in inferring the position of *H. anamallensis* within Gekkonidae radiation. However *RAG-1 + PDC* dataset generated by Gamble et al. [17] had representatives of all the closely related families of Gekkonidae and therefore was useful in molecular dating (see below). Furthermore, in the case of *RAG-1+ PDC* extensive sequence data was available for *Hemidactylus* from previous works by Bauer et al. [13], and Bansal and Karanth [15]. Thus this dataset was also useful in clarifying the position of *H. anamallensis* within the clade consisting of *Hemidactylus* and other closely related genera.

The MP tree was derived through a heuristic search in PAUP\* version 4.0b10 [28] with tree bisection–reconnection branch swapping and 10 replicates of random addition options. Here transversions were weighted based on empirically determined transition/transversion ratios. Supports for various nodes were evaluated through 1000 replicates of bootstrapping in parsimony analysis. Phylogenetic inference using ML algorithm was also performed in PAUP with the substitution model chosen by MODELTEST [29] and tree bisection–reconnection branch swapping and 10 replicates of random addition options. Since PAUP does not allow for partitioning the dataset for ML search, another ML tree was derived in RAxML [30] wherein the dataset was partitioned. Bayesian analysis was run in Mr. Bayes version 3.1 [31] using the mixed model (see supporting information for partitioning scheme) with variable priors for  $10^7$  generations with four chains, wherein sampling was undertaken for every 100 generations. All sample points before the stage when the Markov chain reached a stable likelihood value were discarded as burn-in determined in Tracer v 1.4.1 [32]. The remaining trees were imported into PAUP\* to generate a majority-rule consensus tree and to derive posterior probabilities for each node. Gaps were treated as missing data for all analyses.

#### Analysis of insertions and deletions (indels) in *C-mos* gene

*C-mos* is a proto-oncogene that encodes the protein serine/threonine kinase that regulates meiotic maturation in germ cells [33]. It is a single-copy gene that lacks introns and repetitive elements. Insertions and deletions in *C-mos* have been reported to be uncommon [34]. However, Han et al. [35] reported a 21 bp deletion in *C-mos* that was shared by some gekkonids. Additionally, our preliminary analysis suggested that members of the *Hemidactylus* radiation shared a 9 bp insertion. Given that indels are quite rare in coding regions, such changes could be used as phylogenetically informative characters for determine the position of *H. anamallensis*. Thus we checked the *C-mos* alignment for the presence of these indels in *Hemidactylus* (including *H. anamallensis*) and other related genera.

#### Molecular dating

The *RAG-1* and *PDC* dataset (1439 characters) was also used to determine the divergence dates among *H. anamallensis*, *Hemidactylus* and other closely related genera. Independent calibrations from previously published studies [17–19] were used to constrain nodes in the divergence date analyses. Two out of five calibrations used in the previous studies were excluded from further analysis by the fossil cross-validation method used by Gamble et al. [17]. The excluded calibrations were (i) the minimum age of *Paradelma orientalis/Pygopus nigriceps* split, using the fossil *Pygopus hortulanus*, (ii) the maximum age of squamates, using the oldest known squamate fossil. The calibration points included and used to infer the divergence dates were: (i) Fossil *Primaderma nessovi* [36] was used to constrain the Helodermatidae/Anguidae split (exponential distribution, mean 3.0, offset 99.0). (ii) Two amber preserved specimens of *Sphaerodactylus spp.* [37,38] were used to constrain the node constituting *Sphaerodactylus* species (exponential distribution, mean 5.0, offset 23.0). (iii) The split of *Teratoscincus scincus-Teratoscincus roboroveskii* [39] which was purported to have occurred due to Tein Shan-Pamir uplift in western China, 10 Ma [40,41] (Normal distribution, mean 10.0, SD 0.5)

The dataset was partitioned into two genes (*RAG-1* 1044 bp, *PDC* 395 bp) and the model of sequence evolution as mentioned in supporting information (table S3) was applied to both the partitions. Given that a strict clock model of molecular evolution is purported to be biologically unrealistic [42] a relaxed molecular clock model with uncorrelated lognormal distribution and Yule process tree prior (as recommended for species level phylogenies) were used. These analyses were undertaken in the program BEAST v 1.6.1 [43]. Base frequencies were estimated in BEAST, and gamma distribution categories were set to four. A default setting for substitution rate was used. The program was run for  $5 \times 10^7$  generations. Tracer v 1.4.1 [32] was used to determine convergence and effective sample sizes for the run.

#### Supporting Information

**Figure S1 Bayesian estimates of dates based on *RAG-1* and *PDC* dataset.** Bootstrap supports and Bayesian posterior probabilities are shown at the base of the nodes. Grey bars indicate the credible intervals. K-T indicates Cretaceous-Tertiary boundary and I/A indicates the date of collision of India with Asian plate.  
(TIF)

**Table S1 List of Primers used.**

(DOC)

**Table S2 Thermo cycler profile used for amplification of genes.**

(DOCX)

**Table S3 Partitioning scheme and model of sequence evolution for the genes in the datasets.** The datasets were partitioned according to the genes in both MrBayes and RAxML.

(DOCX)

**Table S4 Estimated ages (in Myr) of the nodes and the corresponding 95% CI for the nodes labelled in figure S1.**

(DOCX)

#### Acknowledgments

We are very grateful to Aniruddha Dutta Roy, Saunak Pal, Mrugank Prabhu and S P Vijayakumar of CES, IISc for providing us with the *H. anamallensis* samples and Varad Giri of BNHS for helping us with

identification of the samples. We thank Critical Ecosystem Partnership Fund (CEPF) granted to CES, IISc under which some *H. anamallensis* samples were collected. We are also thankful to Aniruddha Dutta Roy, Chetan Nag and Ishan Agarwal for providing us with samples of other geckos from different locations in India. Thanks to Prof. N V Joshi of CES, IISc for helping us with the statistical analysis and Karnataka State Forest Department for collection permits.

## References

- Günther A (1875) Second report on collections of Indian reptiles obtained by the British museum. Proc Zool Soc Lond. 224–234+5 pls.
- Strauch A (1887) Bemerkungen über die Gekkoniden-Sammlung im zoologischen Museum der Kaiserlichen Akademie der Wissenschaften zu St. Petersburg. Memoirs de l'Academie Imperial des Sciences St-Petersbourg 7: 35: 2: 1–38.
- Smith MA (1933) Remarks on some old world geckos. Records of the India Museum 35: 9–19.
- Underwood G (1954) On the classification and evolution of geckos. Proc Zool Soc Lond 124: 469–492.
- Kluge AG (1967) Higher taxonomic categories of gekkonid lizards and their evolution. B Am mus Nat Hist 135: 1–59.
- Russell AP (1972) The foot of gekkonid lizards: a study in comparative and functional anatomy. Unpubl. Ph.D. thesis. University of London England.
- Russell AP (1976) Some comments concerning interrelationships amongst gekkonine geckos. Pp 217–244. In A. d'A. . Bellairs and C. B. . Cox (Eds.), Morphology and Biology of Reptiles. London Academic Press.
- Bauer AM, Russel AP (1995) The systematic relationships of *Dravidogecko anamallensis* (Günther 1875). Asiatic Herpetological Research 6: 30–35.
- Uetz P (2013) The Reptile Database. Available: <http://www.reptile-database.org>. Accessed 2013 Mar 22.
- Russell AP (1977) The phalangeal formula of *Hemidactylus* Oken, 1817 (Reptilia: Gekkonidae): a correction and a functional explanation. Anat Histol Embryol 6: 332–338.
- Russell AP (1979) Parallelism and integrated design in the foot structure of gekkoninae and diplodactylinae geckos. Copeia 1: 1–21.
- Carranza S, Arnold EN (2006) Systematics, biogeography, and evolution of *Hemidactylus* geckos (Reptilia: Gekkonidae) elucidated using mitochondrial DNA sequences. Mol Phylogenet Evol 38: 531–545.
- Bauer AM, Giri VB, Greenbaum E, Jackman TR, Dharne MS, et al. (2008) On the Systematics of the Gekkonid Genus *Teratolepis* Günther, 1869: Another one bites the dust. Hamadryad 33: 13–28.
- Bauer AM, Jackman TR, Greenbaum E, Giri VB, de Silva A (2010) South Asia supports a major endemic radiation of *Hemidactylus* geckos. Mol Phylogenet Evol. 57: 342–352.
- Bansal R, Karanth KP (2010) Molecular phylogeny of *Hemidactylus* geckos (Squamata: Gekkonidae) of the Indian subcontinent reveals a unique Indian radiation and an Indian origin of Asian house geckos. Mol Phylogenet Evol. 57: 459–465.
- Zug GR, Vindum JV, Koo MS (2007) Burmese *Hemidactylus* (Reptilia, Squamata, Gekkonidae): Taxonomic notes on Tropical Asian *Hemidactylus*, Proc Calif Acad Sci 4: 58: 387–405.
- Gamble T, Bauer AM, Jackman TR (2008) Out of the blue: a novel trans-Atlantic clade of geckos (Gekkota, Squamata). Zool Scr 37: 355–366.
- Gamble T, Bauer AM, Colli GR, Greenbaum E, Jackman TR, et al. (2010) Coming to America: multiple origins of New World geckos. J Evolution Bio 24: 231–244.
- Nielson SV, Bauer AM, Jackman TR, Hitchmough RA, Daugherty CH (2011) New Zealand geckos (Diplodactylidae): Cryptic diversity in a post-Gondwanan lineage with trans-Tasman affinities. Mol Phylogenet Evol 59: 1–22.
- Briggs JC (2003) The biogeographic and tectonic history of India. J Biogeogr 30: 381–388.
- Chatterjee S, Scotese CR (1999) The breakup of Gondwana and the evolution and biogeography of the Indian plate. Proceedings of the Indian National Science Academy 65A: 397–425.
- Bocxlaer IV, Roelants K, Biju S, Nagaraju J, Bossuyt F (2006) Late Cretaceous Vicariance in Gondwanan Amphibians. PLoS ONE 1(1): e74. doi:10.1371/journal.pone.0000074.
- Russel AP, Bauer AM (1990) Digit in pad-bearing gekkonine geckos: alternate designs and the potential constraints of phalangeal number. Mem Queensl Mus 29: 453–472.
- Sambrook J, Russell D (2001) Preparation of genomic DNA from mouse-tails and other small samples. In: Sambrook J, Russell D, 2001. Molecular cloning: a laboratory manual. Cold Spring Harbor Laboratory Press. Cold Spring Harbor NY pp. 6.23–6.27.
- Feng J, Han D, Bauer AM, Zhou K (2008) Interrelationships among gekkonid geckos inferred from mitochondrial and nuclear gene sequences. Zool Sci 24: 656–665.
- Thompson JD, Higgins DG, Gibson TJ (1994) CLUSTAL W: improving the sensitivity of progressive multiple sequence alignment through sequence weighting, position-specific gap penalties and weight matrix choice. Nucleic Acids Res 22: 4673–4680.
- Tamura K, Dudley J, Nei M, Kumar S (2007) MEGA4: Molecular Evolutionary Genetics Analysis (MEGA) software version 4.0. Mol Biol Evol 24: 1596–1599.
- Swofford DL (2002) PAUP\*: phylogenetic analysis using parsimony (\*and other methods), v4.10b. Sunderland MA. Sinauer.
- Posada D, Crandall KA (1998) MODELTEST: testing the model of DNA substitution. Bioinformatics application note 14: 817–818.
- Stamatakis A (2006) RAXML-VI-HPC: maximum likelihood-based phylogenetic analyses with thousands of taxa and mixed models. Bioinformatics 21:2688–2690.
- Ronquist F, Huelsenbeck JP (2003) MRBAYES 3: Bayesian phylogenetic inference under mixed models. Bioinformatics 19: 1572–1574.
- Rambaut A, Drummond AJ (2007) Tracer v1.4. Available: <http://beast.bio.ed.ac.uk/Tracer> Accessed 2013 Mar 22.
- Graybeal A (1994) Evaluating the phylogenetic utility of genes: a search for genes informative about deep divergences among vertebrates. Syst Biol 43: 174–193.
- Saint KM, Austin CC, Donnellan SC, Hutchinson MN (1998) *C-mos* a nuclear marker useful for squamate phylogenetic analysis. Mol Phylogenet Evol 10: 259–263.
- Han DM, Zhou KY, Bauer AM (2004) Phylogenetic relationships among gekkotan lizards inferred from *C-mos* nuclear DNA sequences and a new classification of the Gekkota. Bio J Linn Soc 83: 353–368.
- Nydam RL (2000) A new taxon of helodermatid-like lizard from the Albian-Cenomanian of Utah. J Verebr Paleontol: 20: 285–294.
- Böhme W (1984) Erstfund eines fossilen Kugel finger geckos (Sauria: Gekkonidae: Sphaerodactylinae) aus Dominikanischem Bernstein (Oligozän von Hispaniola Antillen). Salamandra 20: 212–220.
- Kluge AG (1995) Cladistic relationships of sphaerodactyl lizards. Am Mus Novit 3139: 1–23.
- Macey JR, Wang Y, Ananjeva NB, Larson A, Papenfuss TJ (1999) Vicariant pattern of fragmentation among Gekkonid lizards of the genus *Teratoscincus* produced by the Indian collision: a molecular phylogenetic perspective and an area cladogram for central Asia. Mol Phylogenet Evol 12: 320–332.
- Tapponnier P, Mattauer M, Proust F, Cassaigneau C (1981) Mesozoic ophiolites, sutures, and large-scale tectonic movements in Afghanistan. Earth Planet Sci Lett. 52: 355–371.
- Abdrakhmatov KY, Aldazhanov SA, Hager BH, Hamburger MW, Herring TA, et al. (1996) Relatively recent construction of Tein Shan inferred from GPS measurements of present-day crustal deformation rates. Nature 384: 450–453.
- Drummond AJ, Ho SYW, Phillips MJ, Rambaut A (2006) Relaxed Phylogenetics and Dating with Confidence. PLoS Biol 4: e88.
- Drummond AJ, Rambaut A (2007) BEAST: Bayesian evolutionary analysis by sampling trees." BMC Evol Biol 7: 214.

## Author Contributions

Conceived and designed the experiments: RB KPK. Performed the experiments: RB. Analyzed the data: RB KPK. Contributed reagents/materials/analysis tools: RB KPK. Wrote the paper: RB KPK.
